# Supplementary material for: CX3CR1-Expressing Immune Cells Infiltrate the Tumor Microenvironment and Promote Radiation Resistance in a Mouse Model of Lung Cancer
Source: MDPI journal article supplement (doi:10.3390/cancers15225472), 2023-11-19
Supplement: s1 [file s1]

Supplementary Table S1: List of primers:

|                   |  |                         |
|-------------------|--|-------------------------|
| CDK1 forward      |  | AGGTACTTACGGTGTGGTGTAT  |
| CDK1 reverse      |  | CTCGCTTCAAGTCTGATCTTCT  |
| CDK2 forward      |  | CTCGACACTGAGACTGAAGGT   |
| CDK2 reverse      |  | GCAGCTTGACGATATTAGGGTGA |
| CDK4 forward      |  | AAGGTCACCCTAGTGTTTGAGC  |
| CDK4 reverse      |  | CCGCTTAGAACTGACGCATTAG  |
| Cyclin A2 forward |  | GCCTTCACCATTCAATGTGGAT  |
| Cyclin A2 reverse |  | TTGCTCCGGGTAAAGAGACAG   |
| Cyclin B1 forward |  | GCGTGTGCCTGTGACAGTTA    |
| Cyclin B1 reverse |  | CCTAGCGTTTTTGCTTCCCTT   |
| Cyclin D1 forward |  | GCGTACCCTGACACCAATCTC   |
| Cyclin D1 reverse |  | ACTTGAAGTAAGATACGGAGGGC |
| Cyclin E1 forward |  | GTGGCTCCGACCTTTCAGTC    |
| Cyclin E1 reverse |  | CACAGTCTTGTCATCTTGGA    |
| GAPDH forward     |  | TTGAGGTCAATGAAGGGGTC    |
| GAPDH reverse     |  | TCGTCCCGTAGACAAAATGG    |
