# Supplementary figures and images for: CX3CR1-Expressing Immune Cells Infiltrate the Tumor Microenvironment and Promote Radiation Resistance in a Mouse Model of Lung Cancer
Source: MDPI journal article supplement (doi:10.3390/cancers15225472), 2023-11-19

## Supplementary Figure S4

A.

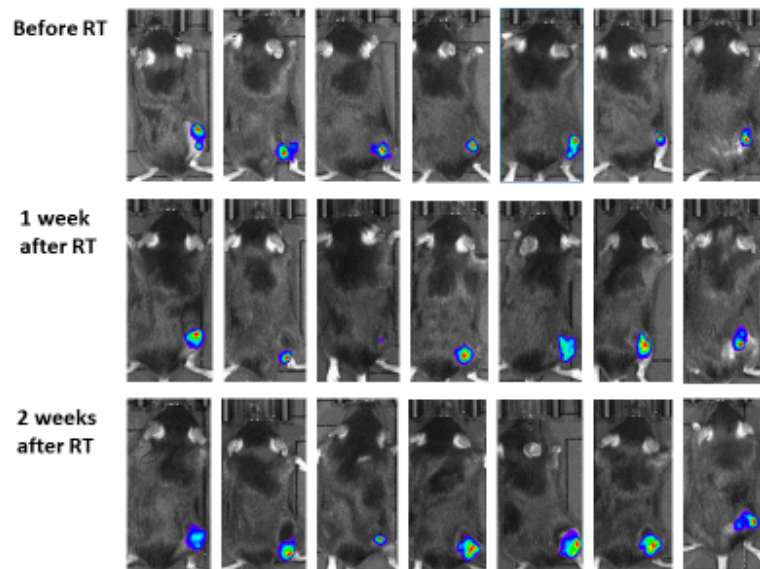

B.

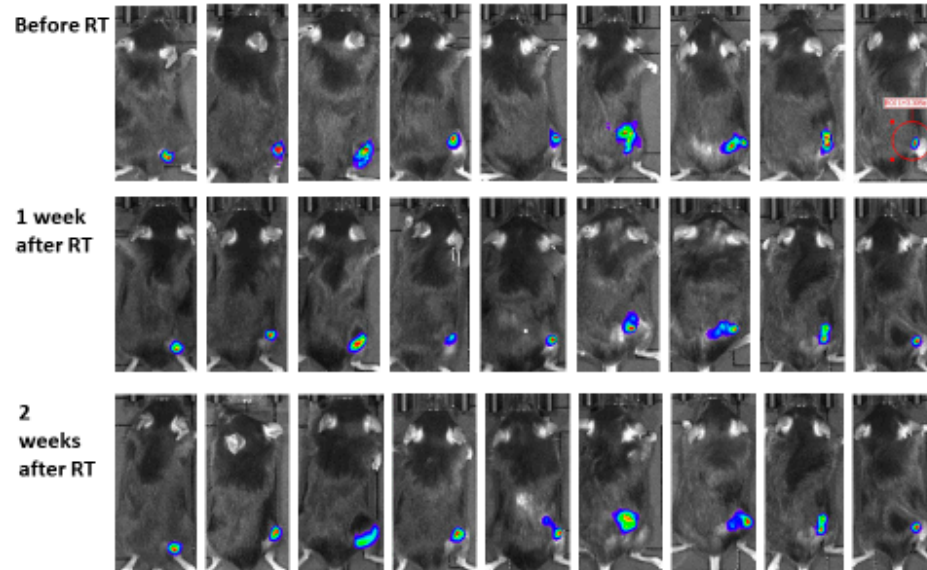

C.

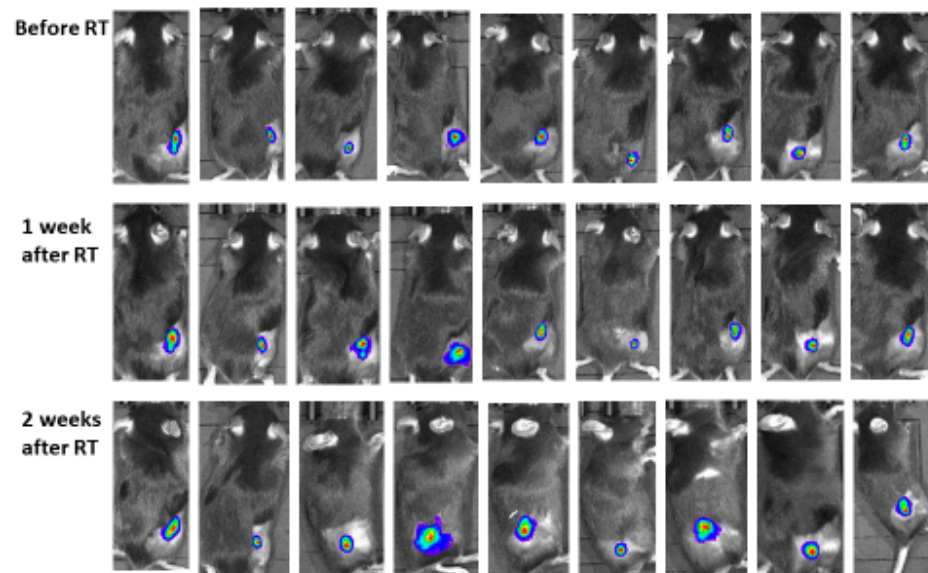

D.

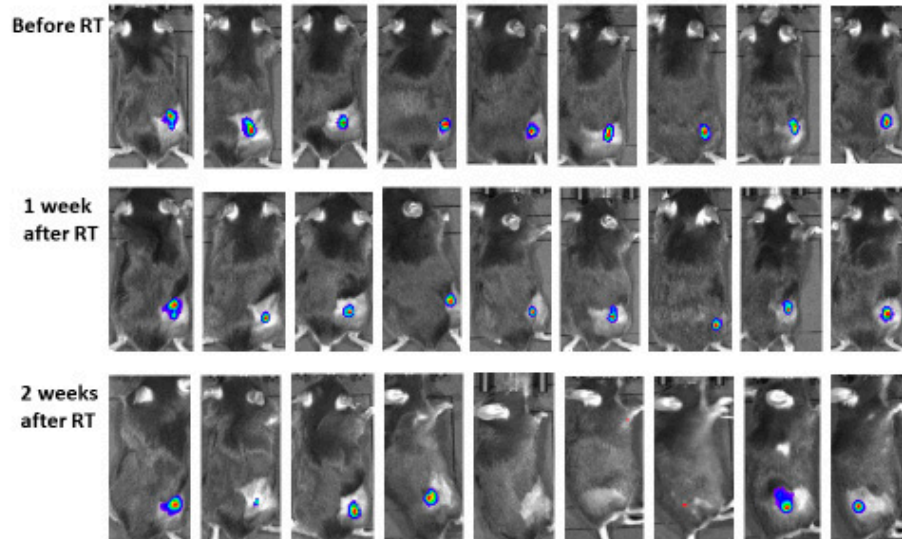

Supplement: s1 [file s1]

Supplementary Figure S1

A.

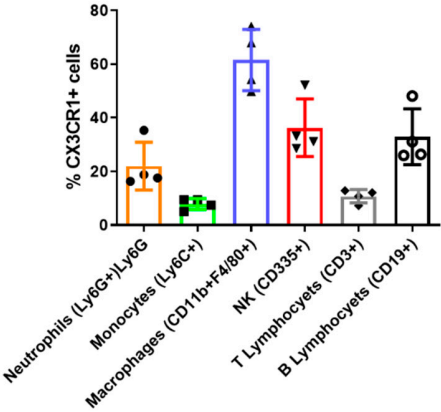

B.

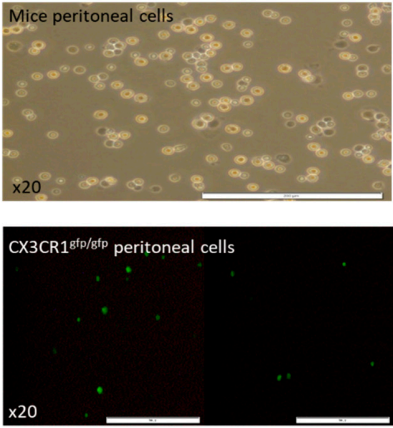

Supplement: s1 [file s1]

Supplementary Figure S2

A.

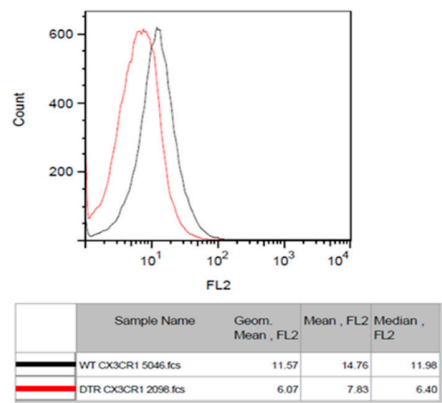

B.

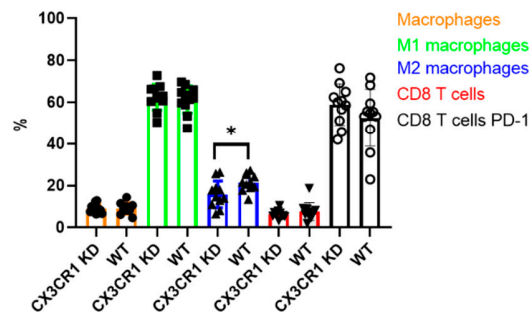

Supplement: s1 [file s1]

Supplementary Figure S3

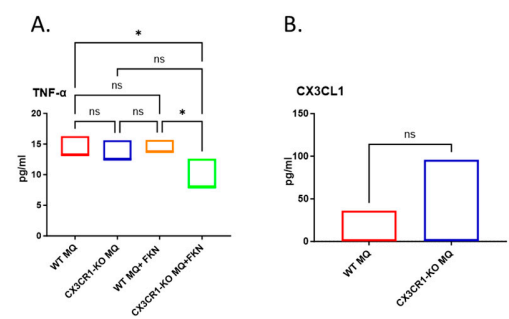

Supplement: s1 [file s1]
